# Supplementary material for: Comprehensive analysis of the secreted proteome of adult Necator americanus hookworms
Source: PLoS Negl Trop Dis. 2020 May 26;14(5):e0008237. doi: 10.1371/journal.pntd.0008237 (PMC7274458; doi:10.1371/journal.pntd.0008237)
Supplement: S5 Table — (XLSX) [file pntd.0008237.s005.xlsx]

## Sheet: pfam_domains
ID	PFAM domain	Start	End	Status
SFG10190427	Pfam:Asp	7	80	visible|OK
SFG10194029	Pfam:MM_CoA_mutase	9	59	visible|OK
SFG10239220	Pfam:Asp	1	58	visible|OK
SFG10561524	low_complexity_region	31	43	visible|OK
SFG11482147	Pfam:A2M_comp	2	55	visible|OK
SFG11646070	low_complexity_region	11	22	visible|OK
SFG11646070	Pfam:Vitellogenin_N	31	209	visible|OK
SFG11770121	Pfam:Globin	6	78	visible|OK
SFG12748447	Pfam:Serpin	1	34	visible|OK
SFG14027628	Pfam:adh_short	2	138	visible|OK
SFG14027628	Pfam:KR	3	120	visible|OK
SFG14027628	Pfam:adh_short_C2	8	139	visible|OK
SFG1850775	Pfam:Ldh_1_N	1	31	visible|OK
SFG1958087	Pfam:Asp	7	89	visible|OK
SFG2018083	Pfam:Peptidase_S24	1	50	visible|OK
SFG2549219	Pfam:MM_CoA_mutase	1	89	visible|OK
SFG3957336	Pfam:MM_CoA_mutase	1	47	visible|OK
SFG4052789	low_complexity_region	113	122	visible|OK
SFG508492	Pfam:Peptidase_M1	3	68	visible|OK
SFG6421178	IGc2	47	114	visible|OK
SFG6421178	low_complexity_region	145	158	visible|OK
SFG6421178	IGc2	170	236	visible|OK
SFG6421178	low_complexity_region	258	272	visible|OK
SFG6532935	S_TKc	1	84	visible|OK
SFG7200548	low_complexity_region	73	84	visible|OK
SFG7200548	low_complexity_region	202	225	visible|OK
SFG7200548	low_complexity_region	240	251	visible|OK
SFG7912550	Pfam:Trypsin	1	90	visible|OK
SFG791673	Pfam:HSP70	1	315	visible|OK
SFG791673	Pfam:MreB_Mbl	1	254	visible|OK
SFG8251638	Pfam:Tropomyosin	1	42	visible|OK
SFG8266549	EGF_Lam	45	84	visible|OK
SFG8486399	Pfam:VWA	2	93	visible|OK
SFG8543136	transmembrane_domain	32	54	visible|OK
SFG8595197	transmembrane_domain	15	37	visible|OK
SFG8595197	transmembrane_domain	72	94	visible|OK
SFG8889936	signal_peptide	1	16	visible|OK
SFG9516322	Pfam:HSP90	84	340	visible|OK
SFG9516322	low_complexity_region	343	359	visible|OK
SFG9845494	Pfam:Actin	1	55	visible|OK
SFG9998331	low_complexity_region	42	57	visible|OK
